# Supplementary material
Source: Springer Nature journal article supplement (https://www.springermedizin.de/resource/supplementary/12990_2008_142_MOESM9_ESM.pdf/9612662)

# Audible vocalizations

## A CeLC

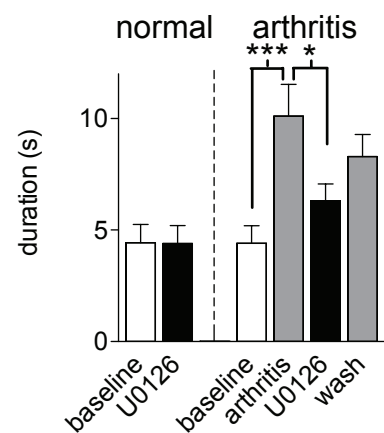

## D striatum

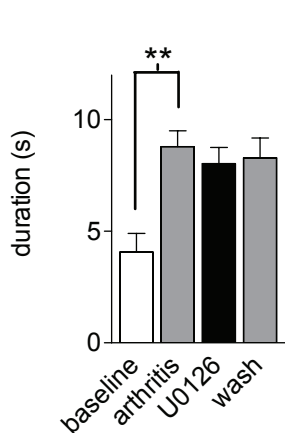

# Ultrasonic vocalizations

## B CeLC

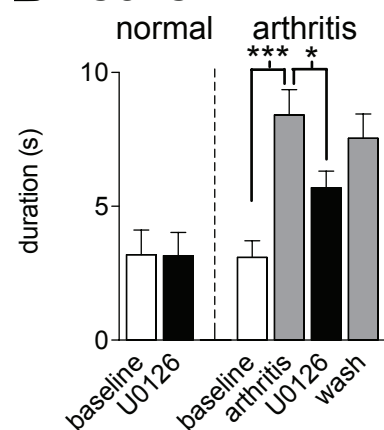

## E striatum

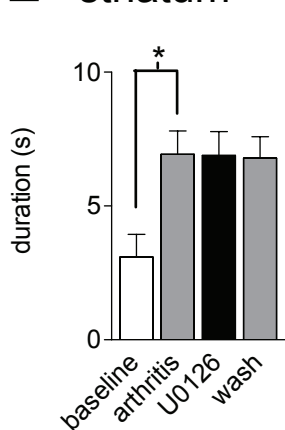

# Spinal reflex

## C CeLC

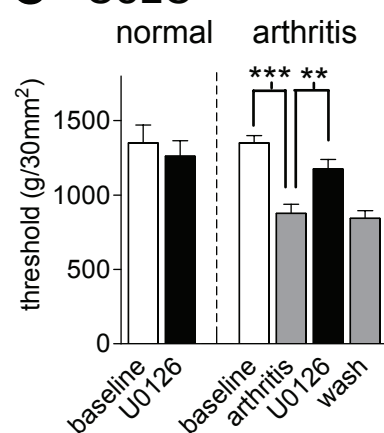

## F striatum

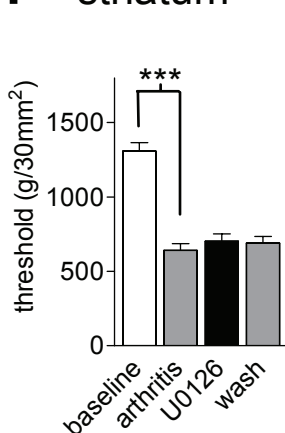

Supplement: MOESM9 [file 9612662]
